# Supplementary material
Source: publisher figshare collection journal article supplement (https://tandf.figshare.com/ndownloader/files/45107744)
Supplement: Supplementary file 1 [file 45107744]

Supplementary Information for

Comparative evaluation of vegetation greenness trends over circumpolar arctic tundra using multi-sensors satellite datasets

Supplementary Figures


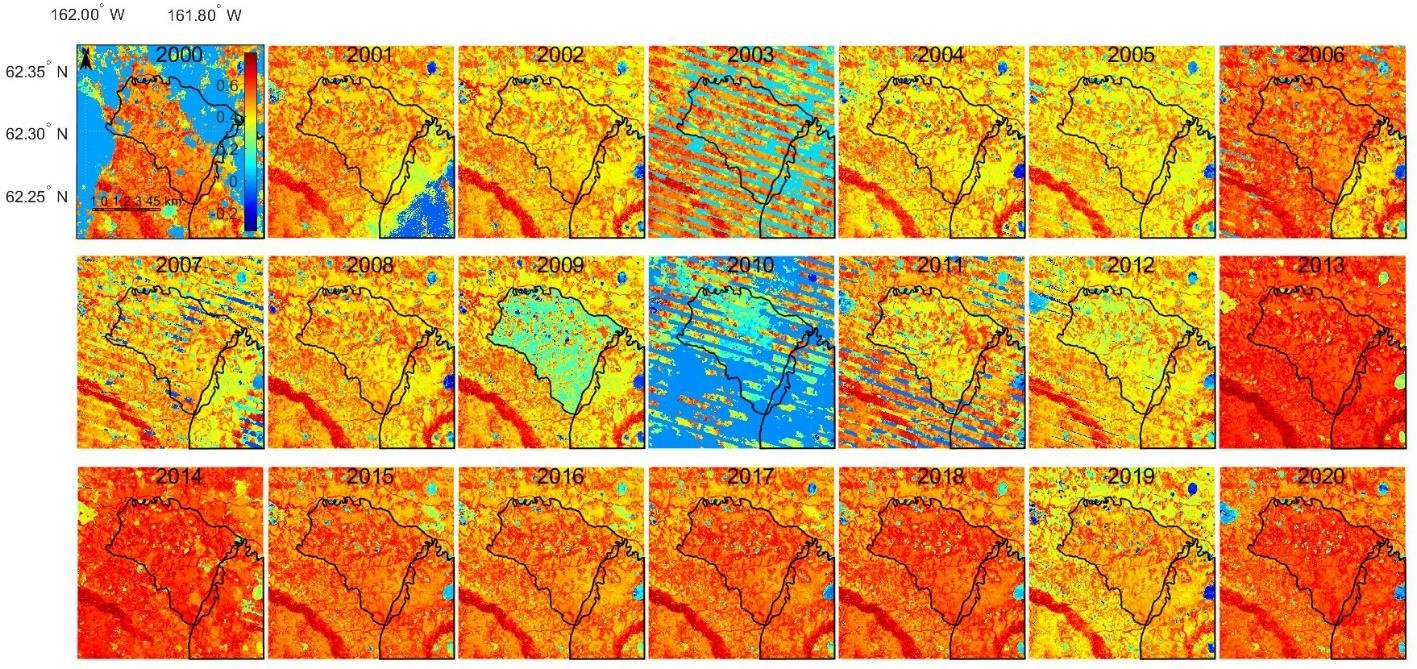


Supplementary Figure 1 Annual maximum NDVI around Allman Lake fire scar in Alaska.


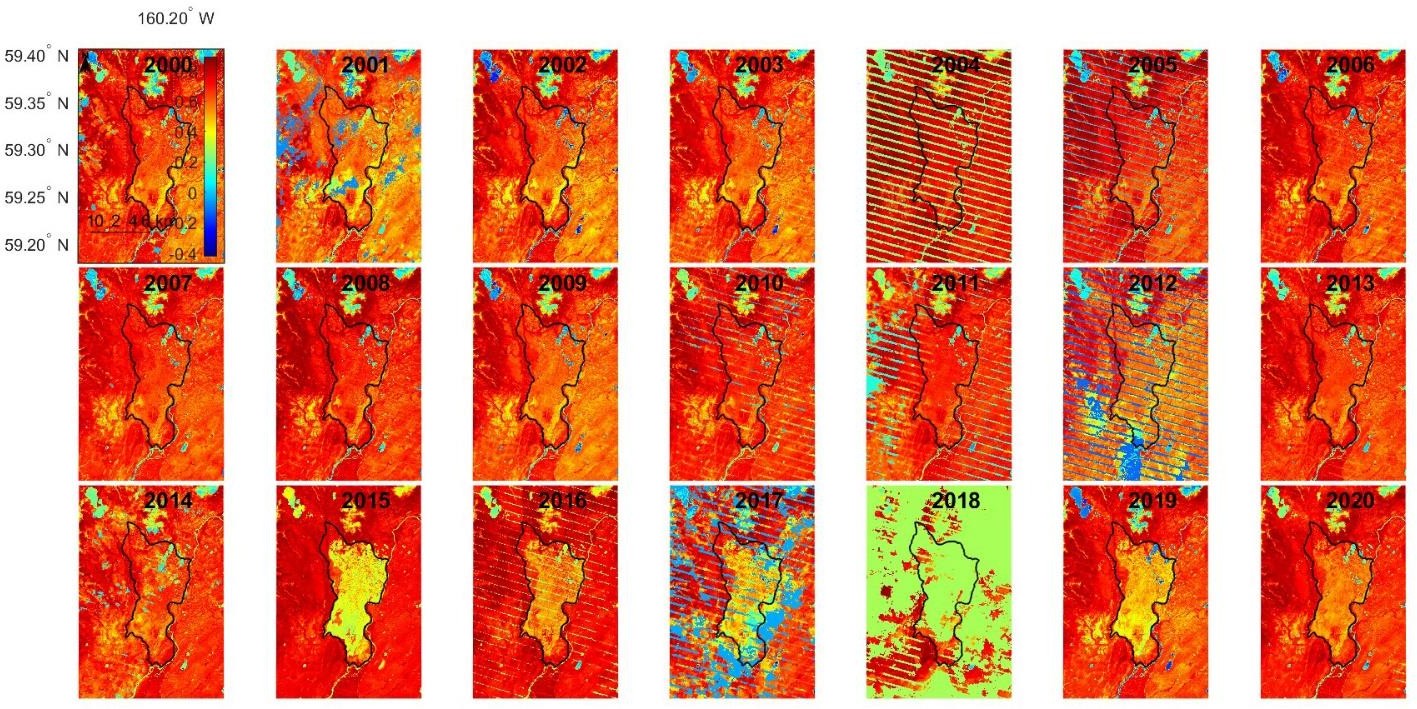


Supplementary Figure 2 Annual maximum NDVI around Gechia Lake fire scar in Alaska.


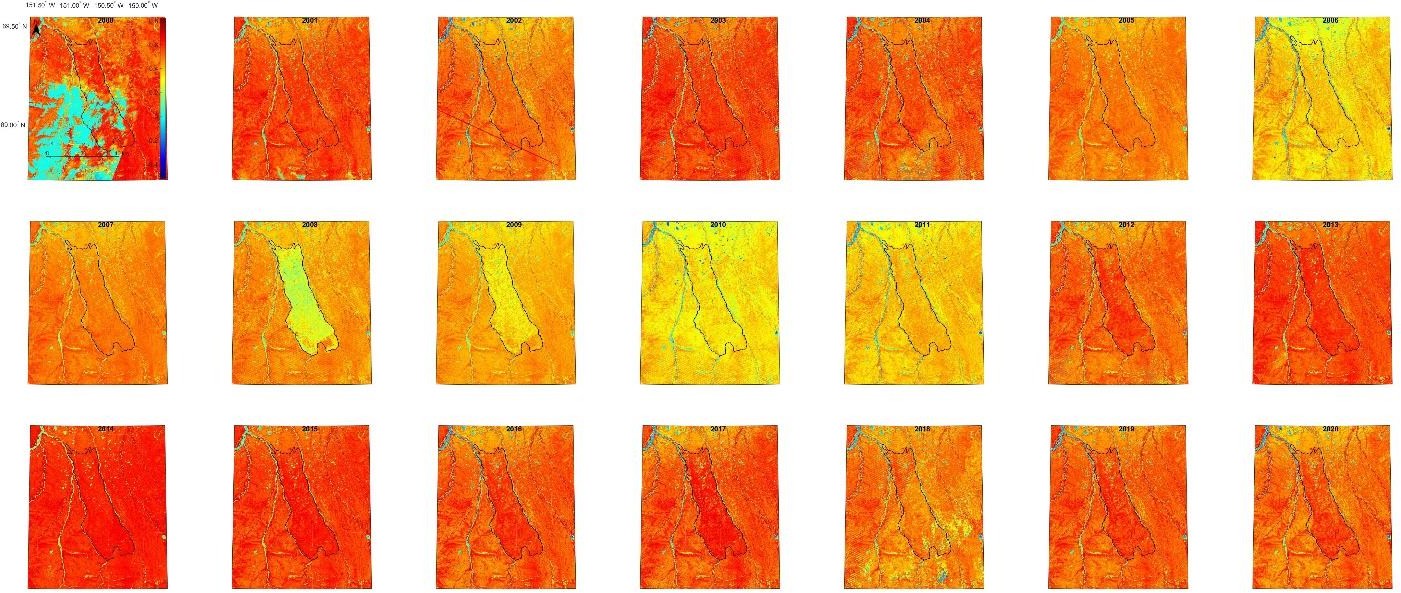


Supplementary Figure 3 Annual maximum NDVI around Anaktuvuk_River fire scar in Alaska.


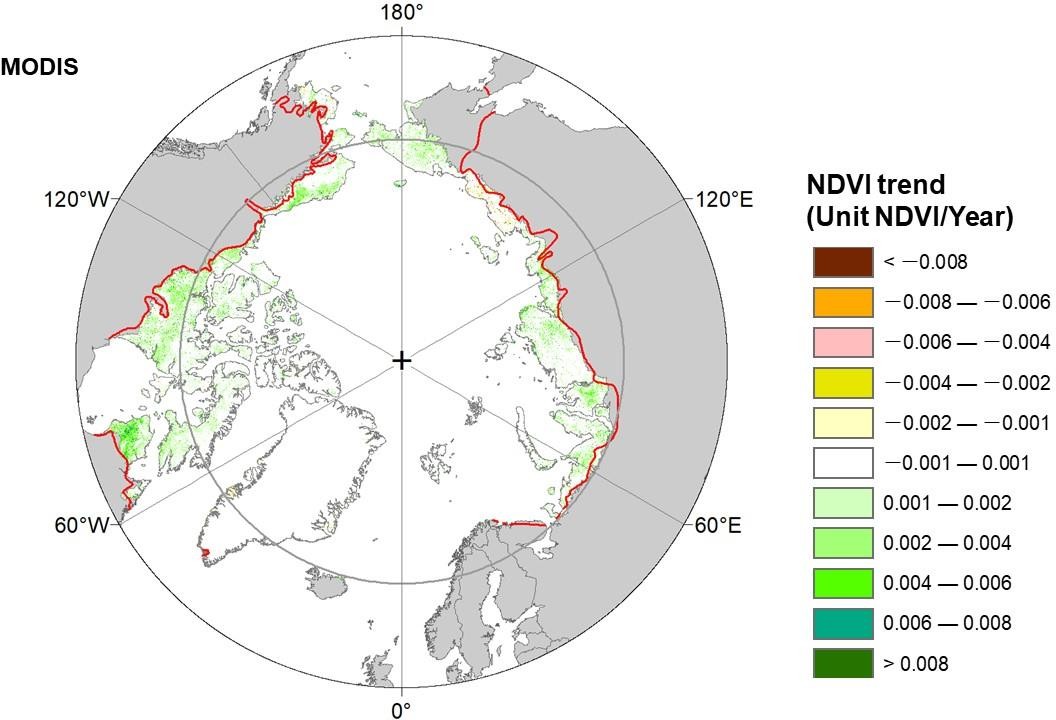


Supplementary Figure 4 Significant greening and browning over circumpolar tundra acquired with MODIS NDVI from 2002 to 2022


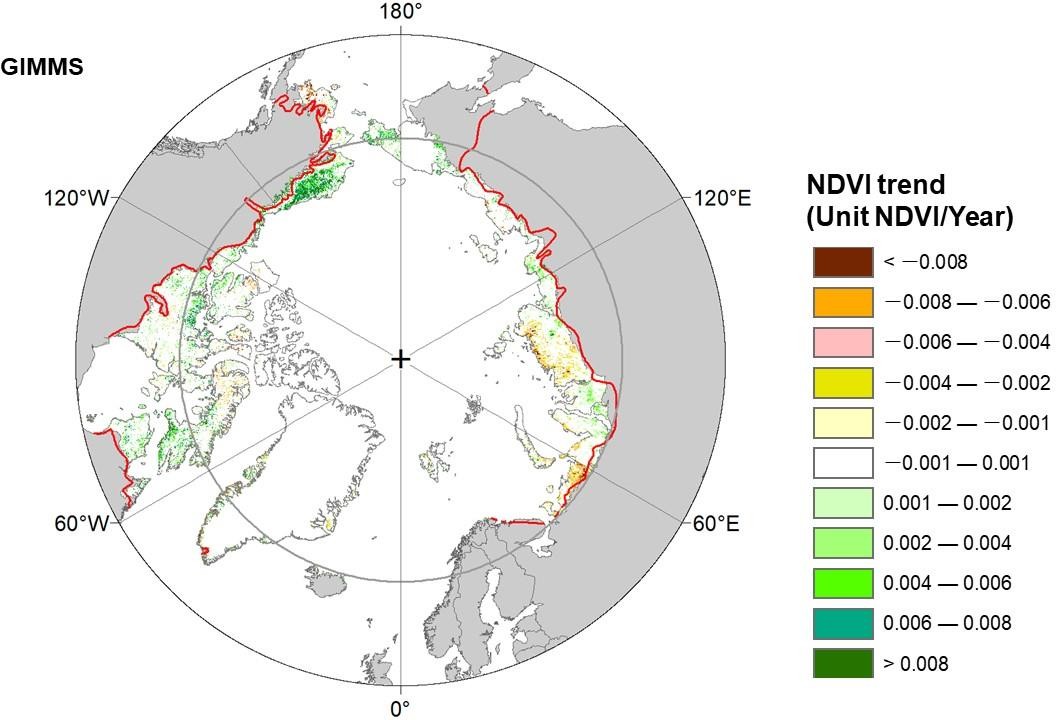


Supplementary Figure 5 Significant greening and browning over circumpolar tundra acquired with GIMMS NDVI from 2000 to 2015


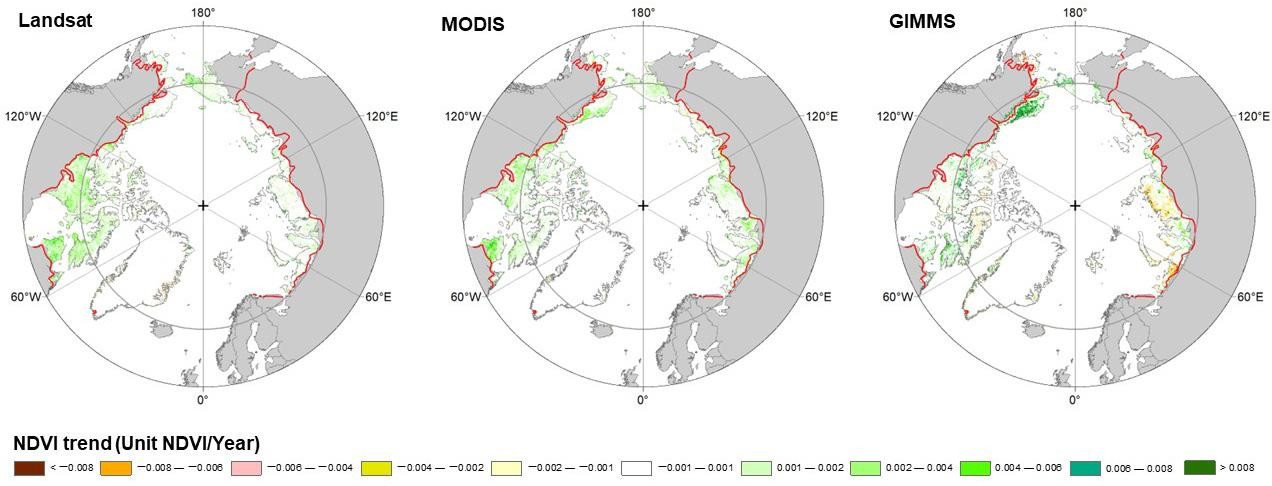


Supplementary Figure 6 Comparison of ssignificant greening and browning over circumpolar tundra acquired with the three datasets
